# Supplementary material
Source: PubMed Central journal article supplement (PMC2567466)
Supplement: 0803506105_Appendix_PDF.pdf [file 0803506105_Appendix_PDF.pdf]

## Supplementary Code:

R code described in the text: (1) Code to generate null models from real species distributions.

```
# Define some initial functions that are called by the main
# function:

calcCondProbs <- function (pa, neighLists = neighbourLists) {
  ### This function calculates the conditional probability
  ### of presence within a cell, given presence in neighboring
  ### cells. Its arguments are pa, a vector indicating presence or
  ### absence within the each square (values 0 or 1) and neighLists,
  ### a list of lists defining adjacency structure within the map.
  ### neighLists should have one list for each square of the map in
  ### the same order as pa, each list containing the indices of all
  ### squares with centre falling within a specified distance
  ### class of the centre of the focal square. For all the analyses
  ### presented here, 10 different distance classes were selected:
  ### 0 - 95km, 96 - 145km, 146 - 196km, etc. In this case
  ### neighLists is 10 items long, with each item a list the length
  ### of pa. The function is used in the calculate of the structural
  ### match between a simulated distribution and the real
  ### distribution.

  pOnly      <- pa == 1
  degree     <- length (neighLists)
  condProb   <- numeric (degree)
  for (i in 1:degree) {
    condProb[i] <- mean(pa[unlist(neighLists[[i]][pOnly])])
  }
  condProb
}

#####

calcHists <- function (pa, neighLists = neighbourLists) {
  ### This function calculates binned probabilities of presence
  ### in the different distance classes for a vector of presence
  ### and absence, pa. It is used in the main function to
  ### identify candidate squares for swapping. Arguments are as
  ### above.

  nnlist     <- lapply(neighbourLists, function(lst) {
    mapply(length, lst)}) # Count neighbours
                        # within distance
                        # classes
  pOnly      <- pa == 1   # Identify cells with presence
  degree     <- length (neighLists) # calculate number of
                        # distance bins.
  presSums   <- vector("list", degree)
```

```

probs      <- presSums

# For each distance bin...
for (i in 1: degree) {
  # identify squares with presence:
  nnlist[[i]]  <- nnlist[[i]][pOnly]
  # count squares with presence:
  presSums[[i]] <- mapply(function(vec) sum(pa[vec]),
                          neighLists[[i]][pOnly])
  # Calculate mean probability of presence within each
  # distance class and generate bins of the frequency of
  # each probability:
  probs[[i]]   <- hist(presSums[[i]] / nnlist[[i]],
                      breaks = seq(0, 1, length = 9),
                      plot = FALSE)
}
probs
}

#####

calcHistErrs <- function (actual = realHists, sim = sim1) {
### This function calculated the root mean squared error of the
### binned probabilities of presence between the real and
### simulated distribution. It is used in the main function to
### identify candidate squares for swapping. Its arguments are
### actual: the output of calcHists for the real distribution; and
### sim: the vector of presence/absence in the simulated
### distribution.

  degree      <- length(realHists) # Count distance categories
  simHists    <- calcHists(sim)     # Calculate bins for
                                   # simulation.
  histDiffs  <- vector("list", length = degree)
  for (i in 1: degree) {
    # For each distance category calculate the difference
    # between the real and simulated bins:
    histDiffs[[i]] <- actual[[i]][[2]] - simHists[[i]][[2]]
  }
  # calculate root mean square error:
  histErrs    <- sum( mapply (function(X) { sqrt(mean((X)^2)) },
                            histDiffs))
}

#####

calcCondProbErrs <- function (actualCPs = realProbs, sim = sim1) {
### This function calculates the difference between the
### conditional probabilities of the real and simulated
### distributions. Its arguments are actualCPs: the output of

```

```

### calcConProbs for the real distribution, and sim, the simulated
### distribution.

# Calculate the conditional probabilities for the simulated
# distribution:
simProbs      <- calcCondProbs(sim)
# Calculate the error:
condProbDiffs <- actualCPS - simProbs
condProbErr   <- sqrt(mean((condProbDiffs*1000)^2))
# If the match is perfect, set error to 0:
if (is.na(condProbErr)) condProbErr <- 0
condProbErr
}

#####

calcAllSums <- function (pa, neighLists = neighbourLists) {
### This function calculates one part of the earlier function:
### the number of squares with presence within each distance
### category. Its arguments are as for calcCondProbs.

  nnlist    <- lapply(neighbourLists, function(lst) {
                                mapply(length, lst)}) # Count neighbours
                                                    # within distance
                                                    # classes

  degree <- length (neighLists)
  presSums <- vector("list", degree)
  for (i in 1: degree) {
    # count squares with presence:
    presSums[[i]] <- mapply(function(vec) sum(pa[vec]),
                            neighLists[[i]][pOnly])
  }
  presSums
}

#####

calcOneSum <- function (pa, neighLists =
                        neighbourLists[[mostWrongDegree]]) {
### This function calculates the number of neighbours with
### presence in the required distance category, but for only one
### distance category, defined by one element of neighLists as
### before.

  presSums <- mapply(function(vec) sum(pa[vec]), neighLists)
}

#####

calcSimErrs <- function (realSimBins = realSimBinned, sim = sim1,
                        bins = binVec, plot.it = FALSE, dists =

```



```

    }
    # Return the root mean square error:
    err1 <- sqrt(mean(((realMeans - simMeans)*1000)^2))
}

```

```
#####
```

```

binomCI <- function (p, n = nlocs) {
### Calculates normal approximation to binomial confidence
### intervals (used only for plots).
    upper <- p + 1.96 * sqrt((p*(1-p))/n)
    lower <- p - 1.96 * sqrt((p*(1-p))/n)
    return (list( upper, lower))
}

```

```
#####
```

```

initMap <- function(pa, neighLists = neighbourLists) {
### This function generates an initial map with the required
### number of presences and absences and conditional probability
### of presence in first order neighbours that approximates that
### of the real map. This map is later refined by iteration. Its
### arguments are identical to those of calcCondProbs.

```

```

    neighbours <- neighLists[[1]] # Identify first order
                                # neighbours
    # Identify neighbours in the middle distance category:
    distNeighs <- neighLists[[round(length(neighLists)/2)]]
    nPres      <- sum (pa, na.rm = T) # count prevalence

```

```

    # Calculate conditional probability within the first
    # distance class:
    condProb <- calcCondProbs(pa)[1]
    # select a focal square at random:
    startloc <- sample(1:nlocs, 1)

```

```

    # Set up some parameters:
    nNeighs <- 0 # Number of neighbours
    simPres <- 0 # pa in simulation
    simDist <- numeric(nlocs) # the simulated distribution
    tested <- numeric(nlocs) # whether the square has been
                                # tested before

```

```

while (simPres < nPres) {
    # While prevalence in the simulated distribution is
    # less than that of the real distribution:

    # count the number of untested neighbours of the focal
    # square:
    nNeighs <- sum(tested[neighbours[[startloc]]] == 0)
    looplim <- 0 # define a counter for the loop

```

```

# while choosing a square with no untested neighbours:
while (nNeighs == 0) {

  looplim <- looplim + 1 # increment counter
  # if the loop is stuck, chose a new focal square:
  if (looplim > 300) startloc <- sample (1:nlocs,1)
  # select a distant neighbour of the focal square:
  startloc <- sample(distNeighs[[startloc]], 1)
  # Set the simulated distribution at the focal square
  # to 1:
  simDist[startloc] <- 1
  # Identify the focal square as tested:
  tested[startloc] <- 1
  # count the number of untested neighbours of the
  # focal square:
  nNeighs <- sum(tested[neighbours[[startloc]]] == 0)
}

# identify the untested neighbours of the focal square:
neighs <- neighbours[[startloc]][tested[
  neighbours[[startloc]]] == 0]
# Define presence / absence in the neighbours of the focal
# square based on the conditional probability:
simDist[neighs] <- sample (0:1, nNeighs, replace = T,
                          prob = c(1-condProb, condProb))
# Identify test locations as tested:
tested[neighs] <- 1

# If focal square has neighbours with presence, select one
# of these squares as the new focal square:
if (sum (simDist[neighs]) > 0) {
  if (sum (simDist[neighs]) == 1) {
    startloc <- neighs[simDist[neighs] == 1]
  } else {
    startloc <- sample (neighs[simDist[neighs] ==
                        1], 1)
  }
}
# Otherwise select any neighbour:
} else {
  if (length (neighs) == 1) {
    startloc <- neighs
  } else {
    startloc <- sample (neighs, 1)
  }
}

simPres <- sum(simDist) # Count number of presences
# if > 90% of squares have already been tested, reset
# tested to 0 and continue:
if (sum (tested) > nPres * 0.9) tested <- numeric(nlocs)

```

```

}

# Check that there are not too many simulated presences:
tooMany <- simPres - nPres
if (tooMany != 0) {
  # if there are any, set any extra presences to 0:
  simDist[sample(which(simDist == 1), tooMany)] <- 0
}
return (simDist)
}

#####

plotFinal <- function(actual = pa, simP = bestSim, realSimBin =
  realSimBinned, binVecP = binVec, realCP, coords) {
### This function plots a real distribution, a final simulation
### and some summaries of the match between the two. Its arguments
### are:
###   actual: a vector of presence / absence in the real
###           distribution.
###   simP: a vector of presence / absence in the simulated
###          distribution.
###   realSimBin: a data.frame as defined in calcSimErrs
###   binVecP: a vector of distance bins for all pairs of
###            squares.
###   realCP: conditional probabilities for the real distribution
###            as calculated by calcCondProbs.
###   coords: a 2-column matrix or data.frame with x and y
###            coordinates for each square.

# Count the distance classes:
degree <- length(neighbourLists)
# Calculate the errors using the variogram:
simErr <- calcSimErrs(realSimBins = realSimBin, bins =
  binVecP, sim = simP)
# Calculate the errors using conditional probability:
condProbP <- calcCondProbErrs(actualCPs = realCP, sim = simP)
# Define the plot layout:
layout(matrix(c(1,1,2,2,3,3,4,4,4,5,5,5,4,4,4,5,5,5),
  ncol = 6, byrow = T))
# Plot the conditional probabilities for the simulation (red).
plot(1:degree, calcCondProbs(simP), xlab = "order", ylab =
  "probability", pch = 20, col = "red", cex = 2.2, ylim =
  c(0,1), main = "Probability | presence")
# Plot the conditional probabilities of the real distribution:
points (1:degree, calcCondProbs(actual), pch = 20, cex = 2.2)
# add some text summarizing the statistics:
plot(1,1, type = "n", axes = FALSE, ylab = "", main =
  "Fit Statistics", cex.main = 2, xlab = "")
mtext(bquote(paste(plain('Conditional Probability Error ') ==
  .(round(condProbP, 2))), sep = "")), line = -5)

```

```

mtext(bquote(paste(plain('Binned Variog. Error ') ==
  .(round(simErr, 2)), sep = "")), line = -3)
# Plot the variograms of the real distribution:
simErr <- calcSimErrs(realSimBins = realSimBin, bins =
  binVecP, sim = simP, plot.it = T)
# Plot the two distributions:
plot(coords[,2], coords[,1], col = actual+1, pch = 20, cex =
  2, xlab = "long", ylab = "lat", main = "Real Dist")
plot(coords[,2], coords[,1], col = simP+1, pch = 20, cex = 2,
  xlab = "long", ylab = "lat", main = "Simulated Dist")
}

#####
### ----- ###
#####

#### The main function:

randDists <- function(pa, nsims = 99, maxiters = 10000,
  plot.final = TRUE, binVecs, neighbourList) {
### This function produces (very slowly) a null distribution with
### equal prevalence and similar conditional probability to a
### given distribution. Its arguments are:
### pa: a vector of 0 and 1 indicating presence/absence in each
### square.
### nsims: the number of simulations required.
### maxiters: the maximum number of iterations required if
### convergence is not reached.
### plot.final: logical, describing whether to plot the final
### distribution of each null model with summary statistics.
### binVecs: a numeric vector defining the distance classes of
### each pairwise comparison of points.
### neighbourList: a list of lists as defined above in
### calcCondProbs.

# First calculate summary statistics for the real
# distribution:
binVec <- binVecs
neighbourLists <- neighbourList
realSim <- matrix(abs(pa [rep (1:nlocs, times =
  nlocs)] - pa[rep(1: nlocs, each = nlocs)]),
  nrow = nlocs)
realSim <- realSim[col(realSim) < row(realSim)]
realSimBinned <- aggregate(realSim, by = list(binVec), sum)
realHists <- calcHists(pa)
realProbs <- calcCondProbs(pa)
realNeighSums <- calcAllSums(pa)

# Set up results matrix (if required):
if (nsims > 1) out <- matrix(NA, ncol = nsims, nrow = nlocs)

```

```

# For each simulation required:
for (jj in 1:nsims) {

  # Generate initial map:
  sim1      <- initMap(pa)
  # save map as bestSim:
  bestSim   <- sim1
  # Calculate summary statistics for simulation:
  simErr    <- calcSimErrs(sim = sim1, realSimBins =
                        realSimBinned)
  simHists  <- calcHists(sim1)
  simProbs  <- calcCondProbs(sim1)
  simNeighSums <- calcAllSums(sim1)
  degree    <- length(realHists)
  HistErr   <- calcHistErrs(actual = realHists, sim =
                        sim1)
  CPerr     <- calcCondProbErrs(actualCPS = realProbs,
                        sim = sim1)
  oldSimErr <- CPerr
  # Define counter:
  loop <- 0

  while (!(CPerr < 5 & loop > 100) & loop <= maxiters) {

    # While the error is greater than the tolerance or
    # the process has run for fewer than 100 iterations
    # and less than the maximum, do pairwise swapping of
    # presence/absence:
    loop      <- loop + 1    # Increment loop
    # Identify the distance class with probabilities
    # differing most between the real and simulated
    # distribution:
    simProbs  <- calcCondProbs(sim1)
    condProbDiffs <- realProbs - simProbs
    condProbErr <- sqrt(mean((condProbDiffs)^2))
    mostWrongDegree <- which (abs(condProbDiffs) ==
                        max(abs(condProbDiffs)))[1]
    pOnly     <- sim1 == 1

    # Identify neighbours for all squares within this most
    # differing class and estimate distance classes with
    # most error:
    nnlist    <- nNeighList[[mostWrongDegree]][pOnly]
    presSums  <- mapply(function(vec) sum(sim1[vec]),
                        neighbourLists[[mostWrongDegree]][
                          pOnly])
    simHist   <- hist(presSums / nnlist, breaks =
                        seq(0, 1, length = 9), plot = FALSE)
    histDiffs <- realHists[[mostWrongDegree]][[2]] -
                        simHist[[2]]
  }
}

```

```

if(length(histDiffs) == 0) histDiffs <- 0 # if perfect
mostWrongBin <- which(abs(histDiffs) == max (abs(
    histDiffs)))[1]
# Identify whether the most strongly differing class
# is a result of over or under simulating within this
# class:
signOfWrong <- sign (histDiffs[mostWrongBin])[1]

if(is.na(signOfWrong) | signOfWrong == 0) {
    signOfWrong <- -1
}
# Set up parameters for this most differing class:
simNeighSums <- calcOneSum(sim1,
    neighbourLists[[mostWrongDegree]])
bins <- seq(0, 1, length = 9)

# identify squares whose of presence / absence is most
# likely result in an improvement:
if (signOfWrong == -1) {
    # If simulation is an overestimate:
    # Identify the bin that is most overestimated:
    mostOppositeBin <- which(histDiffs == max (
        histDiffs)))[1]
    # Identify squares with neighbours matching these
    # requirements and select one from the top 50,
    # biasing selection probability to the best
    # candidates:
    candidates <- simNeighSums[sim1 == 1] /
        nNeighList[[mostWrongDegree]][sim1 == 1]
    candidates <- (1:nlocs)[sim1 == 1][order( abs(
        candidates - mean(
            bins[mostWrongBin],
            bins[mostWrongBin + 1])),
        decreasing = FALSE)]
    selectedloc <- sample( candidates[1 : (min (sum (
        pa), 50))], 1, prob = seq(.1, .01,
        length = min(sum(pa),50)))
    #Set simulation to 0 in this location:
    sim1[selectedloc] <- 0
    # Repeat process to identify a location to swap
    # distribution to 1.
    candidates <- simNeighSums[sim1 != 1] /
        nNeighList[[mostWrongDegree]][sim1
        != 1]
    candidates <- (1:nlocs)[sim1 != 1][order( abs(
        candidates - mean(
            bins[mostOppositeBin],
            bins[mostOppositeBin + 1])),
        decreasing = FALSE)]
    selectedloc <- sample( candidates[1 : (min (sum(
        pa), 50))], 1, prob = seq(.1, .01,

```

```

                                length = (min(sum(pa),50)))
sim1[selectedloc] <- 1
} else {
  # Repeat above procedure if simulation was
  # underestimated in the most wrong distance class:
  mostOppositeBin <- which(histDiffs == min (
    histDiffs))[1]
  candidates <- simNeighSums[sim1 != 1] /
    nNeighList[[mostWrongDegree]][sim1
    != 1]
  candidates <- (1:nlocs)[sim1 != 1][order( abs(
    candidates - mean(
    bins[mostWrongBin],
    bins[mostWrongBin + 1])),
    decreasing = FALSE)]
  selectedloc <- sample( candidates[1 : (min (sum(
    pa),50))], 1, prob = seq(.1, .01,
    length = min(sum(pa),50))
  sim1[selectedloc] <- 1
  candidates <- simNeighSums[sim1 == 1] /
    nNeighList[[mostWrongDegree]][sim1
    == 1]
  candidates <- (1:nlocs)[sim1 == 1][order (abs (
    candidates - mean(
    bins[mostOppositeBin],
    bins[mostOppositeBin + 1])),
    decreasing = FALSE)]
  selectedloc <- sample( candidates[1 : (min (sum(
    pa),50))], 1, prob = seq( .1, .01,
    length = (min( sum( pa), 50))))
  sim1[selectedloc] <- 0
}

if (loop %% 20 == 0) {
  # Every 20 loops calculate the errors:
  CPerr <- calcCondProbErrs(actualCPS = realProbs,
    sim = sim1)
  simErr <- calcSimErrs(sim = sim1, realSimBins =
    realSimBinned)
  if (loop == 100) {
    # Throw away first 100 iterations
    bestSim <- sim1
    oldSimErr <- CPerr
  }
  # Redefine errors with new distribution:
  oldSimErr <- min( oldSimErr, CPerr)
  print( paste ("simErr = ", round(simErr,1), ",
    CPerr = ", round(CPerr,1), sep = ""))
  if(oldSimErr == (CPerr)) {
    # If the error of the current simulation is

```

```
        # lower than that stored, save the current
        # simulation.
        bestSim <- sim1
    }
}
if (nsims > 1) {
    # If multiple simulations are required, store the best
    # simulation in the appropriate column of out.
    out[,jj] <- bestSim
    print(paste("Simulation", jj, "compete"))
}
}
# If required, plot summaries and final distributions:
if (plot.final) plotFinal(pa, bestSim, realSimBin =
    realSimBinned, binVecP = binVec, realCP = realProbs)
# Return final null distributions:
if (nsims > 1) return(out) else return (bestSim)
}
```

```
#####
###-----###
#####
```

## R code described in the text: (2) Code used to fit climate envelopes:

```
fitEnvelope <- function (organismData, weatherData, method,
                        outGrid = NULL, do.cv = TRUE, do.var.imp= FALSE,
                        outputPredictions = TRUE, outputFile = NULL) {

### This function fits climate envelopes to datasets using BIOMOD
### defaults, outputting predictions and models. It requires
### libraries nnet, verification, mgcv. Its arguments are:
### organismData: a vector of 0 and 1 indicating presence and
###                absence in each square.
### weatherData: a numeric matrix or data.frame containing the
###                current climate conditions: rows represent squares in
###                the same order as organismData, each column represents
###                one weather variable.
### method: a character string identifying the fitting method to
###                use. Currently, one of "nnet", "gam" or "glm".
### outGrid: if present, a matrix of the same form as weatherData
###                defining the future climate scenarios at each square.
### do.cv: logical, defining whether the root mean squared error
###                for the model should be measured using 10-fold cross
###                validation.
### do.var.imp: logical, indicating whether leave-one-out cross
###                validation should be used to assess the importance of
###                each weather variable.
### outputPredictions: logical - is the predicted distribution
###                required?
### outputFile: an optional character vector defining a text file
###                to be created to hold output (useful when runing
###                batches).

# Load required packages:
require (nnet)
require (verification)

# Define variables:
dat1          <- organismData
weather       <- weatherData
weather       <- as.matrix (weather)
nRows        <- length (dat1)

# If only one weather variable, rename:
if(dim(weather)[2] == 1) {
  colnames(weather) <- "weather[randSel,]"
}

# If future scenarios are given, format and define output
# matrix:
if(!is.null(outGrid)) {
  outGrid      <- as.matrix(outGrid)
  outRows     <- dim(outGrid)[1]
```

```

    outPreds      <- matrix (nrow = outRows, ncol = 10)
  }

# Select 70% of indices including at least 2 presences:
randSel          <- sample (1:nRows, ceiling((nRows * 7) / 10))
while (sum (dat1[randSel]) < 2)  randSel <- sample (1:nRows,
    ceiling((nRows*7)/10))

# Define output matrices:
trainingPreds    <- matrix(nrow = length (randSel), ncol = 10)
validationPreds  <- matrix(nrow = nRows - length(randSel), ncol
    = 10)
finalPreds       <- matrix(nrow = nRows, ncol = 10)

if (method == "nnet") {
  # If neural networks are required...

  for (j in 1:10) {
    # fit 10 neural networks using BIOMOD defaults:
    assign (paste ("fullnet", j, sep = ""), nnet (x =
        weather[randSel,], y = dat1[randSel], size =
        7, decay = 0.03, maxit = 1000, trace = F))

    # Do predictions for each of the training data, the
    # validation data, the complete dataset and, if
    # required, the scenarios:
    trainingPreds[,j] <- get (paste ("fullnet", j, sep =
        ""))$fitted.values
    validationPreds[,j] <- predict (get (paste ("fullnet",
        j, sep = "")), newdata =
        weather[-randSel,], type =
        "raw")
    finalPreds[,j] <- predict (get (paste ("fullnet",
        j, sep = "")), newdata =
        weather, type = "raw")
    if(!is.null(outGrid)) {
      outPreds[,j] <- predict (get (paste ("fullnet",
        j, sep = "")), newdata =
        outGrid, type = "raw")
    }
  }
  # Calculate the mean predictions across the 10 neural
  # networks:
  trainingPreds <- rowMeans(trainingPreds)
  validationPreds <- rowMeans(validationPreds)
  finalPreds <- rowMeans(finalPreds)
  if(!is.null(outGrid)) outPreds <- rowMeans(outPreds)

} else if (method == "glm") {
  # If fitting method is "glm"...

```

```

# Hide warnings:
def.opt <- options()
options(warn = -1)
# Identify climate variables:
vars <- colnames (weather)

# Calculate the number of two-way interactions to fit,
# based on the length of the dataset and number of
# variables and paste together an appropriate formula:
if(length(vars)>1) {
  nTwoWay <- factorial( length( vars)) / (2 * factorial(
    length( vars) - 2))
  if ((nTwoWay + 2 * length(vars) * 3) <
    length(weather[, 1])) {
    twoWayInts <- paste( rep( vars, each =
      length( vars)), rep( vars, times =
        length( vars)), sep = ":")
    ind <- rep(TRUE, length = length(vars)^2)
    for (ii in 1:length(vars)){
      for (jj in 1:length(vars)) {
        if (ii >= jj) {
          ind[(ii - 1) * length( vars) + jj] <- FALSE
        }
      }
    }
    form1 <- as.formula(paste("dat1[randSel] ~ ",
      paste(paste(vars, collapse = " + "),
        paste("I(", vars, "^2)", sep = "",
          collapse = " + "), paste (
            twoWayInts[ind], collapse = " + "), sep =
              " + ")))
  }
} else {
  form1 <- as.formula(paste("dat1[randSel] ~ ", paste(
    paste( vars, collapse = " + "), paste("I(",
      vars, "^ 2)", sep = "", collapse = " + "),
      sep = " + ")))
}

# Fit the glm model:
normal.glm <- glm (form1, family = binomial, data =
  as.data.frame( weather[randSel, ]))
# Reset the options:
options(def.opt)
# Make predictions from the model for the training,
# validation, full and (if required) future climate
# datasets:
finalPreds <- predict (normal.glm, newdata =
  as.data.frame( weather), type =
    "response")
validationPreds <- predict (normal.glm, newdata =

```

```

        as.data.frame( weather[-randSel, ]),
        type = "response")
trainingPreds  <- normal.glm$fitted.values
if(!is.null(outGrid)) {
  outPreds <- predict (normal.glm, newdata =
    as.data.frame( outGrid), type =
    "response")
}

} else if (method == "gam") {
# If the fitting method required is "gam"...

# Coerce climate data to suitable data.frames and rename
# if required:
weather      <- as.data.frame(weather)
testWeather <- weather[randSel,]
valWeather  <- weather[-randSel,]
if(length(names(weather)) == 1) {
  names(weather)      <- "weath"
  names(testWeather) <- "weath"
  names(valWeather)  <- "weath"
}

# Turn warnings off and require package mgcv:
def.opt <- options()
options(warn = -1)
require (mgcv)

# Paste formula from names and fit gam model:
normal.gam <- eval (parse(text = paste ("gam (
  dat1[randSel] ~ s (", paste( colnames(
  weather), collapse = ","), ", k = 8,",
  "fx = FALSE), family = binomial, data = ",
  "testWeather"))))

# Reset options:
options(def.opt)
# Make predictions from the model for the training,
# validation, full and (if required) future climate
# datasets:
finalPreds      <- predict (normal.gam, newdata =
  weather, type = "response")
validationPreds <- predict (normal.gam, newdata =
  valWeather, type = "response")
trainingPreds   <- normal.gam$fitted.values
if(!is.null(outGrid)) {
  outGrid <- as.data.frame(outGrid)
  if(length(names(outGrid)) == 1) {
    names(outGrid) <- "weath"
  }
  outPreds <- predict (normal.gam, newdata = outGrid,

```

```

        type = "response")
    }
}

# Calculate a matrix of the four corners of a contingency
# table comparing predicted and real presence/absence for the
# complete range of cutoff values in [0,1]:
cutoff <- seq (0, 1, by = 0.01)
result <- matrix (ncol = 101, nrow = 4)
for (j in 1:101) {
    result[1,j] <- sum (trainingPreds > cutoff[j] &
                        dat1[randSel] == 1)
    result[2,j] <- sum (trainingPreds > cutoff[j] &
                        dat1[randSel] == 0)
    result[3,j] <- sum (trainingPreds < cutoff[j] &
                        dat1[randSel] == 1)
    result[4,j] <- sum (trainingPreds < cutoff[j] &
                        dat1[randSel] == 0)
}

kappa <- function (a, b, c, d) {
# This functions calculates Cohen's Kappa.
    kappa <- (2 * ((a * d) - (b * c)))/(((a + b) * (b + d)) +
                                           ((c + d) * (a + c)))
}

# Generate from training data a vector of Kappa values for all
# possible cutoffs :
kappa.vals <- kappa (a = result[1,], b = result[2,], c =
                    result[3,], d = result[4,])

# Find maximum Kappa value:
maxKappa <- max(kappa.vals)
# Define optimal cutoff based on training data
optimal.cutoff <- cutoff[max (which(kappa.vals == max (
    kappa.vals)))]

# Calculate AUC for validation dataset:
AUC <- roc.area (dat1[-randSel], as.vector (
    validationPreds))$A

# Set predictions according to cutoff:
finalPreds[finalPreds > optimal.cutoff] <- 1
finalPreds[finalPreds < optimal.cutoff] <- 0

if(do.cv) {
# If 10-fold cross-validation is required...

    # Define variables to store results:
    MSE <- numeric (10)
    CError <- matrix (NA, ncol = dim (weather)[2], nrow =
        10)

```

```

# Generate cross-validation subsets:
cvsubsets <- sample (rep(1:10, ceiling( length( randSel) /
                                10)))[1 : length( randSel)]
for (ii in 1:10) {
  assign (paste ("randSel", ii, sep = ""),
         randSel[cvsubsets != ii])
}

for (k in 1:10) {
# For each of the 10-fold cross validations...

# Repeat above procedure on the required subset (code
# is effectively a repeat of above with different
# datasets):
if (method == "nnet") {
  CVPreds <- matrix(nrow = length( randSel[cvsubsets
                                == k]), ncol = 10)
  for (j in 1:10) {

    assign (paste ("fullnetCV", j, sep = ""),
           nnet( x =weather[get(paste("randSel",
                                     k, sep = "")),], y = dat1[get( paste(
                                     "randSel", k, sep = ""))], size = 7,
               decay = 0.03, maxit = 1000, trace =
               FALSE))

    CVPreds[,j] <- predict (get (paste (
                                "fullnetCV", j, sep = "")),
                           newdata =
                           weather[randSel[cvsubsets ==
                                             k],], type = "raw")
  }
  CVPreds <- rowMeans(CVPreds)
  MSE[k] <- sum(((dat1[randSel[cvsubsets == k]] -
                  CVPreds) ^ 2)) / length (CVPreds)

} else if (method == "glm") {

  def.opt <- options()
  options(warn = -1)
  if ((nTwoWay + 2 * length( vars) * 3) < length(
    weather[,1])) {
    form1 <- as.formula( paste(
      "dat1[randSel[cvsubsets != k]] ~ ",
      paste( paste( vars, collapse = " +
                    "), paste("I(", vars, "^2)", sep =
                    "", collapse = " + "), paste (
                    twoWayInts[ind], collapse = " + "),
            sep = " + ")))
  } else {
    form1 <- as.formula( paste(

```

```

        "dat1[randSel[cvsubsets != k]] ~ ",
        paste( paste( vars, collapse = " + "),
        paste("I(", vars, "^2)", sep = "",
        collapse = " + "), sep = " + "))
    }
cv.glm <- glm (form1, family = binomial, data =
  as.data.frame( weather[randSel[cvsubsets
    != k],]))
options(def.opt)
CVPreds <- predict (cv.glm, newdata =
  as.data.frame(
    weather[randSel[cvsubsets == k],]),
  type = "response")
MSE[k] <- sum(((dat1[randSel[cvsubsets == k]] -
  CVPreds) ^ 2))/length (CVPreds)

} else if (method == "gam") {

  def.opt <- options()
  options(warn = -1)
  normal.gam <- eval (parse( text = paste ("gam (
    dat1[randSel[cvsubsets !=k]]",
    " ~ s (" , paste(colnames(weather),
    collapse = ","), ", k = 8,", "fx =
    FALSE), family = binomial, data = ",
    "as.data.frame(
    weather[randSel[cvsubsets != k],
    ]))" )))
  options(def.opt)
  CVPreds <- predict (normal.gam, newdata =
    as.data.frame(
      weather[randSel[cvsubsets == k],]),
    type = "response")
  MSE[k] <- sum(((dat1[randSel[cvsubsets == k]] -
    CVPreds) ^ 2)) / length (CVPreds)
}

if(do.var.imp) {
# If a leave-one-out cross validation of the
# importance of each parameter is also required...

  for (i in 1:dim(weather)[2]) {
# For each climate variable repeat the cross-
# validation procedure dropping each climate
# variable in turn. Code is again a repeat of
# above.

    if (method == "nnet") {
      CVSubPreds <- matrix(nrow = length(
        randSel[cvsubsets == k]),
        ncol = 10)
    }
  }
}

```

```

for (j in 1:10) {
  assign (paste ("CVsubnet", j, sep =
    ""), nnet (x =
    weather[randSel[cvsubsets !=
    k], -i], y =
    dat1[randSel[cvsubsets != k]],
    size = 7, decay = 0.03,
    maxit = 1000, trace = F))

  CVSubPreds[,j] <- predict (get (paste
    ("CVsubnet", j, sep = "")),
    newdata =
    weather[randSel[cvsubsets ==
    k], -i], type = "raw")
}
CVSubPreds <- rowMeans( CVSubPreds)
CVError[k,i] <- sum(
  ((dat1[randSel[cvsubsets ==
  k]] - CVSubPreds) ^ 2)) /
  length (CVSubPreds)

} else if (method == "glm") {
  def.opt <- options()
  options(warn = -1)
  vars <- colnames (weather[, -i])
  nTwoWay <- factorial(length( vars)) / (2 *
    factorial (length(vars) - 2))
  if ((nTwoWay + 2 * length( vars)) * 3 <
  length( weather[,1])) {
    twoWayInts <- paste( rep( vars, each =
      length( vars)), rep(
      vars, times = length(
      vars)), sep = ":")
    ind <- rep(TRUE, length = length(
      vars)^2)
    for (ii in 1:length(vars)){
      for (jj in 1:length(vars)) {
        if (ii >= jj) {
          ind[(ii - 1) * length(
            vars) + jj] <- FALSE
        }
      }
    }
  }
  form1 <- as.formula( paste(
    "dat1[randSel[cvsubsets != k]]
    ~ ", paste( paste( vars,
    collapse = " + "), paste("I(",
    vars, "^2)", sep = "",
    collapse = " + "), paste (
    twoWayInts[ind], collapse = "

```



```

}

if(do.var.imp) {
# If leave-one-out cross validation of the importance of each
# parameter is required...

# Define some objects to hold the results:
diffMinusVarI <- matrix(NA, ncol = 3, nrow = dim(
      weather)[2])
rownames (diffMinusVarI)      <- colnames(weather)
colnames (diffMinusVarI)      <- c("Kappa", "AUC", "CV")
if (do.cv) diffMinusVarI[,3] <- colMeans(CVerror) -
      mean(MSE)

for (i in 1:dim(weather)[2]) {
# For each climate variable in turn, fit models and make
# predictions as above, leaving the climate parameters out
# sequentially.
  if (method == "nnet") {
    trainingSubPreds <- matrix (nrow = length(
      randSel), ncol = 10)
    validationSubPreds <- matrix (nrow = nRows -
      length( randSel), ncol = 10)
    finalSubPreds <- matrix(nrow = nRows, ncol =
      10)

    for (j in 1:10) {

      assign (paste ("subnet", j, sep = ""), nnet(x=
        weather[randSel, -i], y =
        dat1[randSel], size = 7, decay = 0.03,
        maxit = 1000, trace = F))

      trainingSubPreds[,j] <- get (paste ("subnet",
        j, sep =
        ""))$fitted.values
      validationSubPreds[,j] <- predict (get (paste(
        "subnet", j, sep = "")),
        newdata = weather[
        -randSel, -i], type =
        "raw")
      finalSubPreds[,j] <- predict (get (paste (
        "subnet", j, sep = "")),
        newdata = weather[, -i],
        type = "raw")
    }
    trainingSubPreds <- rowMeans(trainingSubPreds)
    validationSubPreds <- rowMeans(validationSubPreds)
    finalSubPreds <- rowMeans(finalSubPreds)

  } else if (method == "glm") {

```

```

def.opt <- options()
options(warn = -1)
vars <- colnames (weather[,-i])
nTwoWay <- factorial( length( vars)) / (2 *
      factorial (length(vars) - 2))
if ((nTwoWay + 2 * length( vars)) * 3 < length(
      weather[ ,1])) {
  twoWayInts <- paste(rep(vars, each = length(
      vars)), rep( vars, times =
      length( vars)), sep = ":")
  ind <- rep(TRUE, length = length( vars) ^ 2)
  for (ii in 1:length(vars)){
    for (jj in 1:length(vars)) {
      if (ii >= jj) {
        ind[(ii - 1) * length( vars) +
          jj] <- FALSE
      }
    }
  }
  form1 <- as.formula( paste( "dat1[randSel] ~
    ", paste( paste( vars, collapse = " +
    "), paste( "I(", vars, "^ 2)", sep =
    "", collapse = " + "), paste (
    twoWayInts[ind], collapse = " + "),
    sep = " + "))
} else {
  form1 <- as.formula( paste( "dat1[randSel] ~
    ", paste( paste( vars, collapse = " +
    "), paste( "I(", vars, "^2)", sep =
    "", collapse = " + "), sep = " + "))
}
sub.glm <- glm (form1, family = binomial, data =
  as.data.frame( weather[randSel, ]))
options(def.opt)
finalSubPreds      <- predict (sub.glm, newdata =
  as.data.frame( weather),
  type = "response")
validationSubPreds <- predict (sub.glm, newdata =
  as.data.frame( weather[
  -randSel, ]), type =
  "response")
trainingSubPreds   <- sub.glm$fitted.values
} else if (method == "gam") {

def.opt <- options()
options(warn = -1)
sub.gam <- eval (parse( text = paste ("gam (
  dat1[randSel] ~ s (", paste( colnames(
  weather[, -i]), collapse = ","), ", k =
  8,", "fx = FALSE), family = binomial,

```



```

} else {
  mainResults <- list(method = method, Kappa = maxKappa,
                     AUC = AUC)
}
if (do.cv) mainResults$MSE <- mean(MSE)
if (do.var.imp) {
  mainResults$variableImportance <-diffMinusVarI
}
if (outputPredictions) mainResults$fittedDistrib <- finalPreds
if (!is.null(outGrid)) {
  mainResults$predictedDistrib <- outPreds
  mainResults$optimalCut      <- optimal.cutoff
}

if (!is.null(outputFile)) {
# If required, write the output to a text file:

  outputFile = file (outputFile, open = "a")
  writeLines (paste ("species: ", paste( deparse(
    substitute( organismData))))), outputFile)
  writeLines (paste("method: ", method), outputFile)
  writeLines (paste("climate: ", paste( deparse(
    substitute( weatherData))))), outputFile)
  writeLines (paste(mainResults), outputFile)
  close (outputFile)
}

# Return the final results:
return (mainResults)
}

```

### R code described in the text : (3) Power analysis pattern generation

```
cutModel <- function (clim1, clim2, clim3, clim4, Climate =
                      currentClim) {
### This function defines presence/absence for a distribution
### based on user provided tolerances to four climate variables.
### It is called repeatedly by the main function, to determine the
### deterministic pattern used. Its arguments are:
### clim1 - clim4: numeric vectors of length 2 defining the
###     upper and lower tolerances on each of the climate axes:
###     they should be passed in the same order as the columns
###     in currentClim.
### Climate: a matrix or data.frame containing the climate
###     variables, one per column, each row defining the climate
###     in one distribution square.

  pa <- Climate[,3] < clim1[2] & Climate[,3] > clim1[1] &
        Climate[,4] < clim2[2] & Climate[,4] > clim2[1] &
        Climate[,5] < clim3[2] & Climate[,5] > clim3[1] &
        Climate[,6] < clim4[2] & Climate[,6] > clim4[1]
  pa <- as.numeric(pa)
}
```

```
allClim <- function(pa, climate, additionalProp = 0,
                   allowDispersal = TRUE, neighbourLists) {
### This function generates a deterministic distribution to be
### used in the power test. It can generate completely
### deterministic patterns, or patterns containing an element of
### noise. It must be called only in an environment already
### containing the functions documented in earlier sections. Its
### arguments are:
### pa: a vector of presence/absence for a real distribution: it
###     is used to determine the required prevalence in the
###     deterministic pattern, and if a noisy pattern is to be
###     generated, the spatial structure of this pattern will be
###     the target for erosion following dispersal.
### climate: a matrix of climate variables, one row for each
###     location in the distribution.
### additionalProp: numeric. If desired, the deterministic
###     distribution can be generated with higher prevalence than
###     the actual distribution.
### allowDispersal: Logical, if TRUE once the deterministic
###     pattern with the required prevalence is generated, the
###     'species' disperses into all neighbours of squares with
###     presence, generating false positives.
### neighbourLists: a list of lists describing the adjacency
###     structure of squares in the distribution. It has structure
###     identical to that described in earlier functions.

  # Rename climate:
```

```

currentClim <- climate
# Calculate target prevalence:
n1      <- sum(pa, na.rm = T)
# Calculate prevalence plus additional proportion:
n       <- ceiling(n1 * (1 + additionalProp))

# Select some initial climate tolerances falling within the
# range of each climate variable:
clim1 <- sort(runif(2, min(currentClim[,3], na.rm = T),
                    max(currentClim[,3], na.rm = T)))
clim2 <- sort(runif(2, min(currentClim[,4], na.rm = T),
                    max(currentClim[,4], na.rm = T)))
clim3 <- sort(runif(2, min(currentClim[,5], na.rm = T),
                    max(currentClim[,5], na.rm = T)))
clim4 <- sort(runif(2, min(currentClim[,6], na.rm = T),
                    max(currentClim[,6], na.rm = T)))

# Define the first distribution based on these tolerances:
mod1      <- cutModel( clim1, clim2, clim3, clim4)
mod1[is.na(mod1)] <- 0
# Define some parameters:
nlocs     <- length(mod1)
nmod      <- sum(mod1)
# Print the number of presences in the distribution:
print(paste("n = ", n, "nmod = ", nmod))
# Determine whether initial model is too small or too large:
size      <- ifelse(nmod < n, "small", "large")

while(nmod != n) {
# While the prevalence in the model is not the target
# prevalence:

# Calculate the proportion of each climate axis tolerated
# by the 'species'
prClim1 <- (clim1[2] - clim1[1]) / (Rclim1[2] - Rclim1[1])
prClim2 <- (clim2[2] - clim2[1]) / (Rclim2[2] - Rclim2[1])
prClim3 <- (clim3[2] - clim3[1]) / (Rclim3[2] - Rclim3[1])
prClim4 <- (clim4[2] - clim4[1]) / (Rclim4[2] - Rclim4[1])
# Save the current climate tolerance and indication of
# current match:
oldClims <- list(clim1, clim2, clim3, clim4, size, up)
# Randomly select 0 or 1 to indicate whether to start by
# tolerance at the upper or lower limit:
up <- rbinom(1,1,0.5)

if (nmod < n) {
# If there are too few presences in the distribution widen
# the climatic tolerance on an selected axis:

# Identify the current distribution as too small:
size <- "small"

```

```

if (size != oldClims[[5]]) {
# If the distribution has too few presences but
# previously had too many, narrow the same climate
# variable previously widened:

    narrow <- wide
    up <- oldClims[[6]]

} else {
# otherwise identify the narrowest climate
# tolerance...

    narrow <- which.min( c( prClim1, prClim2, prClim3,
                           prClim4))
}

# and increase it, based on the previous tolerance to
# this variable:
if (narrow == 1) {
# If the first climate variable is the narrowest,
# select new limits for this one:

    if (size != oldClims[[5]]) {
        if(up == 1) {
            clim1[2] <- runif(1, clim1[2],
                             oldClims[[1]][2])
        } else {
            clim1[1] <- runif(1, oldClims[[1]][1],
                             clim1[1])
        }
    } else {
        if(up == 1) {
            clim1[2] <- runif(1, clim1[2], max(
                currentClim[,3], na.rm = T))
        } else {
            clim1[1] <- runif(1, min(currentClim[,3],
                                     na.rm = T), clim1[1])
        }
    }
}

} else {
# Otherwise...

    if (narrow == 2) {
# if the first climate variable is the narrowest,
# select new limits for this one:

        if (size != oldClims[[5]]) {
            if(up == 1) {
                clim2[2] <- runif(1, clim2[2],
                                 oldClims[[2]][2])
            }
        }
    }
}

```

```

    } else {
      clim2[1] <- runif(1, oldClims[[2]][1],
                      clim2[1])
    }
  } else {
    if(up == 1) {
      clim2[2] <- runif(1, clim2[2], max(
        currentClim[,4], na.rm =
        TRUE))
    } else {
      clim2[1] <- runif(1, min(
        currentClim[,4], na.rm =
        TRUE), clim2[1])
    }
  }
} else {
# Etc.
  if (narrow == 3) {
    if (size != oldClims[[5]]) {
      if(up == 1) {
        clim3[2] <- runif(1, clim3[2],
                        oldClims[[3]][2])
      } else {
        clim3[1] <- runif(1,
                        oldClims[[3]][1],
                        clim3[1])
      }
    } else {
      if(up == 1) {
        clim3[2] <- runif(1, clim3[2],
                        max(currentClim[,5],
                        na.rm = TRUE))
      } else {
        clim3[1] <- runif(1, min(
          currentClim[,5],
          na.rm = T), clim3[1])
      }
    }
  } else {
    if (size != oldClims[[5]]) {
      if(up == 1) {
        clim4[2] <- runif(1, clim4[2],
                        oldClims[[4]][2])
      } else {
        clim4[1] <- runif(1,
                        oldClims[[4]][1],
                        clim4[1])
      }
    } else {
      if(up == 1) {
        clim4[2] <- runif(1, clim4[2],

```

```

max(currentClim[,6],
na.rm = TRUE))
} else {
    clim4[1] <- runif(1, min(
        currentClim[, 6],
        na.rm = T), clim4[1])
}
}
}
}
}
# Generate a new model distribution with the wider
# tolerance:
mod1 <- cutModel(clim1, clim2, clim3, clim4)
mod1[is.na(mod1)] <- 0
nmod <- sum(mod1)

} else {
# Or if the distribution has too many presences, do the
# opposite of above to choose a parameter to narrow:

if(nmod > n) {
    size <- "large"
    if (size != oldClims[[5]]) {
        wide <- narrow
        up <- oldClims[[6]]
    } else {
        wide <- which.min( c (prClim1, prClim2,
            prClim3, prClim4))
    }
    if (wide == 1) {
        if (size != oldClims[[5]]) {
            if(up == 1) {
                clim1[2] <- runif(1, clim1[2],
                    oldClims[[1]][2])
            } else {
                clim1[1] <- runif(1, oldClims[[1]][1],
                    clim1[1])
            }
        } else {
            if(up == 1) {
                clim1[2] <- runif(1, clim1[1],
                    clim1[2])
            } else {
                clim1[1] <- runif(1, clim1[1],
                    clim1[2])
            }
        }
    } else {
        if (wide == 2) {
            if (size != oldClims[[5]]) {

```

```

        if(up == 1) {
            clim2[2] <- runif(1, clim2[2],
                            oldClims[[2]][2])
        } else {
            clim2[1] <- runif(1,
                            oldClims[[2]][1],
                            clim2[1])
        }
    } else {
        if(up == 1) {
            clim2[2] <- runif(1, clim2[1],
                            clim2[2])
        } else {
            clim2[1] <- runif(1, clim2[1],
                            clim2[2])
        }
    }
} else {
    if (wide == 3) {
        if (size != oldClims[[5]]) {
            if(up == 1) {
                clim3[2] <- runif(1, clim3[2],
                                oldClims[[3]][2])
            } else {
                clim3[1] <- runif(1,
                                oldClims[[3]][1],
                                clim3[1])
            }
        } else {
            if(up == 1) {
                clim3[2] <- runif(1, clim3[1],
                                clim3[2])
            } else {
                clim3[1] <- runif(1, clim3[1],
                                clim3[2])
            }
        }
    } else {
        if (size != oldClims[[5]]) {
            if(up == 1) {
                clim4[2] <- runif(1, clim4[2],
                                oldClims[[4]][2])
            } else {
                clim4[1] <- runif(1,
                                oldClims[[4]][1],
                                clim4[1])
            }
        } else {
            if(up == 1) {
                clim4[2] <- runif(1, clim4[1],
                                clim4[2])
            }
        }
    }
}

```



```

condProbErr      <- sqrt( mean(( condProbDiffs) ^ 2))
# Identify distance class that is most different between
# the simulation and the real distribution:
mostWrongDegree <- which( abs( condProbDiffs) ==
                        max( abs( condProbDiffs)))[1]
# Identify the squares with simulated presence:
pOnly           <- mod1 == 1
# Select the appropriate neighbour list and identify the
# squares which, if turned to absence, would most likely
# to improve the conditional probability match between the
# simulation and real distribution (exactly as in
# randDists and documented there):
nnlist         <- neighbourLists[[mostWrongDegree]][pOnly]
presSums       <- mapply (function (vec) sum(mod1[vec]),
                        neighbourLists[[mostWrongDegree]][pOnly])
simHist        <- hist( presSums / sapply( nnlist,
                        length), breaks = seq(0, 1, length=
                        9), plot = FALSE)
histDiffs      <- realHists[[mostWrongDegree]][[2]] -
simHist[[2]]
mostWrongBin   <- which(abs(histDiffs) == max (abs(
histDiffs)))[1]
signOfWrong    <- sign (histDiffs[mostWrongBin])
simNeighSums   <- calcOneSum(mod1,
neighbourLists[[mostWrongDegree]])
bins           <- seq(0, 1, length = 9)

if (signOfWrong == -1) {
# If the most wrong distance class is a consequence of too
# many presences in this class, identify candidates,
# select one and set to 0:

  candidates <- simNeighSums[mod1 == 1] /
nNeighList[[mostWrongDegree]][mod1 ==
1]
  candidates <- (1:(min(sum(pa), 50)))[mod1 ==
1][order(abs( candidates - mean(
bins[mostWrongBin], bins[mostWrongBin +
1])), decreasing = FALSE)]
  selectedloc <- sample(candidates[1:(min(sum(pa),
50))], 1, prob = seq(.1, .01, length =
min( sum(pa), 50)))
  mod1[selectedloc] <- 0
} else {
# Otherwise select the distance class with most errors
# caused by overestimates and select one to remove as
# before:
  mostOppositeBin <- which(histDiffs == min (
histDiffs)))[1]
  candidates <- simNeighSums[mod1 == 1] /

```

```

        nNeighList[[mostWrongDegree]][mod1 == 1]
candidates <- (1:nlocs)[mod1 == 1][order( abs(
        candidates - mean(bins[mostOppositeBin],
        bins[mostOppositeBin+1])), decreasing =
        FALSE)]
selectedloc <- sample( candidates[1:(min(sum(pa),
        50))], 1, prob = seq(.1, .01, length =
        min( sum( pa), 50)))
mod1[selectedloc] <- 0
}

# Print the error in prevalence:
print( sum( mod1) - n1)
nmod <- sum( mod1)
}
# Calculate the proportion of the final pattern that was from
# the deterministic pattern (the signal to noise ratio):
SNR <- sum( detMod == 1 & mod1 == 1) / n1

# Return the simulated distribution and the signal to noise
# ratio:
return(list(PA = mod1, SNR = SNR))
}

```
